1 **The human cerebellum is essential for modulating perceptual sensitivity based on temporal**  
2 **expectations**

3

4 SHORT TITLE: Cerebellar role in attentional orienting in time

5

6 Assaf Breska and Richard B. Ivry

7 Department of Psychology and Helen Wills Neuroscience Institute

8 University of California, Berkeley, CA 94720-1650

9

10 Corresponding author:

11 Assaf Breska

12 2121 Berkeley Way, Berkeley, CA 94720-1650

13 [assaf.breska@berkeley.edu](mailto:assaf.breska@berkeley.edu)

14  
15  
16  
17  
18  
19  
20  
21  
22  
23  
24  
25  
26  
27  
28

## Abstract

A functional benefit of attention is to proactively enhance perceptual sensitivity in space and time. Although attentional orienting has traditionally been associated with cortico-thalamic networks, recent evidence has shown that individuals with cerebellar degeneration (CD) show a reduced reaction time benefit from cues that enable temporal anticipation. While this deficit may reflect impairment in anticipatory motor preparation, it could also arise from cerebellar contribution to attentional modulation in time of perceptual sensitivity. To examine this, we tested CD participants on a non-speeded, challenging perceptual discrimination task, asking if they benefit from temporal cues. Strikingly, the CD group showed no duration-specific perceptual sensitivity benefit when cued by repeated but aperiodic presentation of the target interval. In contrast, they performed similar to controls when cued by a rhythmic stream. This dissociation further specifies the functional domain of the cerebellum and establishes its role in the attentional adjustment of perceptual sensitivity in time.

29 Introduction

30 Adaptive behavior is facilitated by an attentional system that can proactively modify the  
31 state of perceptual systems. While the majority of research on the underlying mechanisms has  
32 focused on spatial orienting, the brain is also anticipatory in time<sup>1</sup>. In temporal anticipation, the  
33 brain exploits various temporal regularities in the environment to predict the timing of upcoming  
34 sensory events. These temporal expectations can guide temporal orienting, the adjustment of  
35 attention in time to modulate perceptual sensitivity, for example increasing it at expected compared  
36 to unexpected times<sup>2-4</sup> (sometimes referred to in the literature as ‘temporal attention’). This form  
37 of anticipation has been often associated with left inferior parietal and ventral premotor cortices<sup>4-</sup>  
38 <sup>6</sup>, a network that overlaps with frontal-parietal components of the cortico-thalamic network  
39 traditionally implicated in attentional orienting in space<sup>7-9</sup>.

40 Recently, we reported that individuals with cerebellar degeneration (CD) fail to exhibit  
41 reaction time benefits from temporal cues on a simple detection task<sup>10,11</sup>. These findings implicate  
42 the cerebellum in temporal preparation, but are agnostic to whether it has a role in attentional  
43 modulation of perceptual systems. This is because in speeded detection tasks, reaction time  
44 benefits from temporal cues could result from adjustment of perceptual sensitivity and/or of motor  
45 preparation<sup>3,12-14</sup>. Given the well documented role of the cerebellum in precisely timed  
46 movement<sup>15,16</sup>, the impairments we observed in the CD group may merely reflect a novel  
47 manifestation of the cerebellar role in the temporal control of motor preparation<sup>17</sup>. However, the  
48 cerebellum could also be essential to attentional orienting in time to proactively modulate  
49 perception. Determining the functional domain of the cerebellum in temporal anticipation is  
50 critical to both models of attention and of cerebellar function.

51 To address this question, we compared the ability of individuals with cerebellar  
52 degeneration (CD) and healthy controls to use temporal cues to benefit performance in a  
53 challenging non-speeded perceptual discrimination task, in which the benefits of attention are  
54 assumed to reflect modulation of perceptual sensitivity<sup>2,4,18</sup>. Participants judged the orientation of  
55 a briefly presented visual target whose contrast was set to be near-threshold, making the task  
56 perceptually demanding. In each trial, a temporal cue indicated that the interval between the target  
57 and a preceding warning signal (WS) would either be 600 or 1000 ms (Figure 1A). Targets mostly  
58 appeared at the cued time (valid trials) and rarely at the uncued time (invalid trials). Critically,  
59 participants were only queried for a response after a substantial random delay following target  
60 offset. In tandem with our instructions that only emphasized accuracy, the inclusion of the delay  
61 eliminated the need for motor preparation. With these manipulations, we assume that the expected  
62 performance advantage on valid compared to invalid trials (validity effect<sup>2,5,19–21</sup>) will reflect  
63 temporally-focused enhancement of perceptual sensitivity. If the cerebellum has a causal role in  
64 attention orienting in time at a non-motor level, the validity effect should be reduced in CD patients  
65 relative to controls.

66 In addition to manipulating the validity of the temporal cue, we also varied the manner in  
67 which this information was presented. In our previous work<sup>10,11</sup>, we found that the cerebellar  
68 involvement was limited to when temporal anticipation required encoding and recalling an isolated  
69 interval, but not when temporal anticipation could be based on synchronization with a stream of  
70 rhythmic sensory events. We employ a similar manipulation in the present study, comparing  
71 perceptual benefits from interval and rhythmic temporal cues (Figure 1B).

72

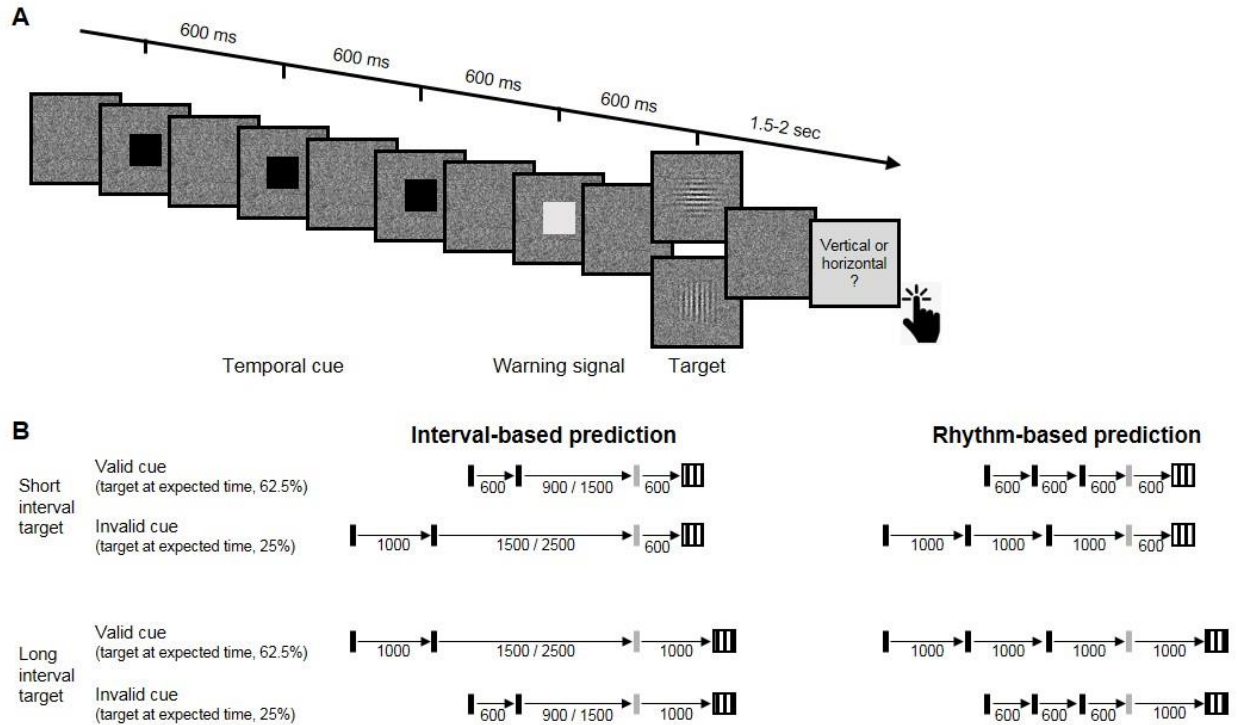

73

74

75 **Figure 1. Experimental task.** **A.** Trial sequence, depicting a trial with the faster rhythmic temporal cue.  
 76 Participants viewed a visual stream of black squares (temporal cue), followed by a white square (warning  
 77 signal, WS), and then a luminance-defined Gabor grating (target). Participants made a delayed, non-speeded  
 78 judgment of the orientation of the grating. Continuous dynamic masking was generated by a white noise  
 79 visual stimulus mask that changed at 60 Hz. Whereas the black and white squares were highly visible when  
 80 superimposed on the mask, the target was embedded in the noise, reducing its visibility. The target contrast  
 81 was set on an individual basis using an adaptive procedure. **B.** Temporal cue conditions. The target could  
 82 appear at a short (600 ms, top) or long (1000 ms, bottom) interval after the WS. Left: Interval task. Two  
 83 black squares were separated by either the short or long interval, with a random non-isochronous interval  
 84 between the second black square and the WS. On valid trials (62.5%), this interval matched the WS-target  
 85 interval; on invalid trials (25%), it matched the other interval (in the remaining 12.5% ‘catch’ trials there  
 86 was no target). Right: Rhythm task. Three black squares and the WS appeared with identical SOA (short /  
 87 long). Valid and invalid trials were as in the Interval task.

88

89

## Results

90 Perceptual sensitivity was quantified using  $d'$ , a measure derived from signal-detection  
91 theory<sup>22</sup>. Temporal orienting should manifest as higher  $d'$  for valid compared to invalid trials. A  
92 4-way omnibus analysis of variance (ANOVA) revealed a significant validity effect across groups,  
93 tasks and target intervals (main effect of Cue Validity:  $F(1,23)=13.79$ ,  $p=0.001$ ,  $\eta_p^2=0.37$ ). Prior  
94 work has shown that the validity effect is less robust, or even absent for late targets<sup>19,23</sup>. Thus, we  
95 developed an a priori analysis plan that focuses on the early target trials to increase sensitivity for  
96 detecting attenuation of the validity effect (see Methods). As expected, the validity effect was  
97 larger when the target appeared at the early onset time (Cue Validity X Interval interaction:  
98  $F(1,23)=3.59$ , one-tailed  $p=0.035$ ,  $\eta_p^2=0.14$ ). Indeed, neither group showed a significant validity  
99 effect in either task for the late onset targets (all  $p$ 's > 0.1).

100 Analysis of the  $d'$  values for early onset targets revealed a significant validity effect (3-  
101 way ANOVA,  $F(1,23)=14.74$ ,  $p=0.001$ ,  $\eta_p^2=0.39$ ). Across tasks, the validity effect was larger in  
102 the Control compared to the CD group ( $F(1,23)=5.05$ ,  $p=0.034$ ,  $\eta_p^2=0.18$ ), but this effect was  
103 qualified by a significant Cue Validity X Group X Task interaction ( $F(1,23)=4.52$ ,  $p=0.044$ ,  
104  $\eta_p^2=0.16$ ). We used a series of planned contrasts to evaluate the validity effect within each task.  
105 For the Interval task (Figure 2A), the validity effect was significantly smaller in the CD group  
106 relative to the Control group (2-way ANOVA, Cue Validity X Group interaction:  $F(1,23)=7.11$ ,  
107  $p=0.014$ ,  $\eta_p^2=0.24$ ). The Control group showed a higher mean  $d'$  for valid compared to invalid  
108 trials ( $t(11)=3.08$ ,  $p=0.01$ , Cohen's  $d=0.89$ ), while  $d'$  values in the CD group were not significantly  
109 different, and even numerically higher on invalid trials ( $t(12)= -0.43$ ,  $p=0.67$ ,  $BF_{10}=0.21$ , moderate  
110 evidence against a directional hypothesis of a validity effect). Thus, the CD group failed to show  
111 an enhancement in perceptual sensitivity from an interval-based temporal cue.

112 A different pattern was observed on the Rhythm task (Figure 2B). Here, the magnitude of  
113 validity effect did not differ between the two groups ( $F(1,23)=0.09$ ,  $p=0.77$ ,  $\eta_p^2<0.01$ ,  $BF_{10}=0.3$ ).  
114 The Control group again showed a validity effect ( $t(11)=2.69$ ,  $p=0.021$ , Cohen's  $d=0.78$ ).  
115 However, unlike in the Interval task, the CD group also showed a validity effect ( $t(12)=3.36$ ,  
116  $p=0.006$ , Cohen's  $d=0.93$ ). Thus, the ability to increase perceptual sensitivity at a specific time  
117 point based on a rhythm cue was preserved in the CD group. Furthermore, the presence of the 3-  
118 way interaction implies that the attenuation of the validity effect in the CD group relative to  
119 controls was significantly larger in the Interval task than in the Rhythm task.

120

121

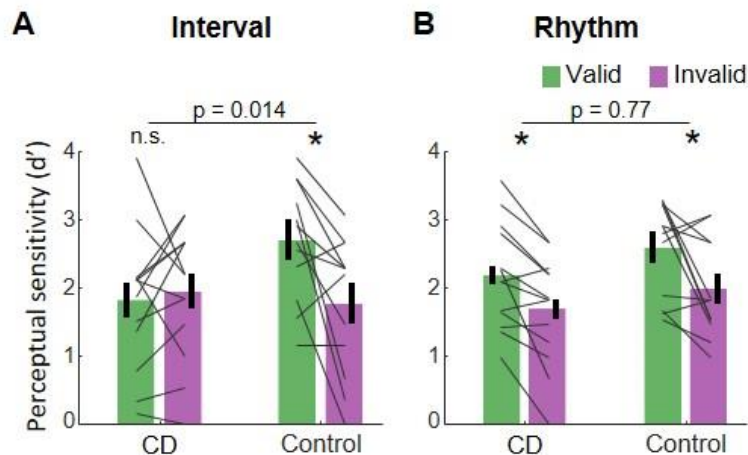

122

123 Figure 2. Absence of validity effect in individuals with cerebellar degeneration following interval-based,  
124 but not rhythm-based temporal cues. A. Interval task. Mean  $d'$  for temporally expected (valid) and  
125 unexpected (invalid) for the CD and Control groups. Unlike the controls, the CD group showed no increase  
126 in  $d'$  when the target appeared at the expected time. B. Rhythm task. Both groups show a similar increase  
127 in  $d'$  on valid trials. \*  $p<0.05$ . In both A and B, error bars represent one standard error of the mean (SEM).  
128 Gray lines depict individual subject data.

129

130

## Discussion

131

132

133

134

135

136

137

138

139

140

Our results provide compelling evidence that the integrity of the human cerebellum is necessary for proactive modulation of perceptual processing based on temporal expectations. The ability to use a temporal cue to enhance perceptual sensitivity at specific times was abolished in individuals with cerebellar degeneration when prediction was based on an interval cue. In contrast, the CD group showed a comparable benefit to controls when temporal orienting was based on a rhythmic cue. Critically, the use of a non-speeded, challenging perceptual discrimination task argues strongly against the idea that the impairment is related to motor preparation processes. Rather, the results point to an essential context-specific role of the cerebellum in the temporal orienting of visual attention, adding to the substantial literature highlighting cerebellar involvement in a broad range of cognitive functions beyond the motor domain<sup>24</sup>.

141

142

143

144

145

146

147

148

149

150

151

These findings point to the need for an expanded picture of the neuroanatomical network involved in attentional control of perceptual sensitivity. Attention research has traditionally emphasized cortico-thalamic networks, and in particular, dorsal and ventral fronto-parietal networks associated with top-down and stimulus-driven attention control, respectively<sup>7-9</sup>. For attention orienting in the time domain, human imaging studies consistently reveal activations of the left inferior parietal cortex and the ventral premotor cortex<sup>4-6</sup>. Similarly, neural signatures of temporal anticipation identified in human electrophysiology studies have been localized to cortico-thalamic circuits<sup>25,26</sup>. In general, the cerebellum has not featured in this work (but see, for example, <sup>27</sup>). This might reflect the difficulty in neuroimaging studies to separate the effects of temporal prediction on neural activations from the effects of other task parameters, or the difficulty of electrophysiology studies to measure cerebellar sources.



152 Our neuropsychological approach provides a more direct method to evaluate the  
153 contribution of the cerebellum to attention. Previous work, focusing on the spatial domain, has  
154 proven inconclusive. Some studies have found that individuals with focal cerebellar lesions show  
155 reduced benefits from cues indicating the spatial location of a forthcoming stimulus<sup>28,29</sup>. However,  
156 it has been proposed that these impairments may be motoric in nature, with the tasks confounding  
157 attentional demands with demands on eye movements and/or response preparation<sup>30,31</sup>. These  
158 concerns do not apply to the current study given that the spatial aspects of the task were fixed and  
159 the motor requirements were minimal, delayed until well after stimulus offset. We note that the  
160 current results do not address the question of whether the cerebellum, in addition to its role in  
161 temporal orienting of attention, is also involved in other spheres of attention.

162 The dissociation between the impairment in the interval task and the preserved  
163 performance in the rhythm task in the CD group has two important implications. First, a  
164 longstanding debate in the timing literature concerns whether temporal anticipation in a rhythmic  
165 context is mediated by rhythm-specific mechanisms (e.g., entrainment) or by the repeated  
166 operation of an interval-based mechanism<sup>21,32,33</sup>. Our results are at odds with the latter hypothesis  
167 given that the CD group failed to benefit from the interval cues yet showed normal benefits from  
168 the rhythm cues.

169 Second, selective contributions of the cerebellum in interval-based but not rhythm-based  
170 timing have been observed in multiple timing domains, including duration judgments, timed  
171 movement, and timed motor preparation<sup>10,11,34,35</sup>. Our findings extend this functional specificity to  
172 the attentional domain, pointing to a generalized role for the cerebellum in interval timing, at in  
173 the sub-second range. Notably, while inferences from single dissociations such as that observed in  
174 the present study can be limited by concerns about differences in task difficulty, this concern is

175 alleviated by the comparable benefits observed in healthy controls from interval- and rhythm-  
176 based cues<sup>10,11,21</sup> (also observed in current dataset: Cue Validity X Task interaction within the  
177 Control group,  $F(1,11)=0.81$ ,  $p=0.39$ ,  $\eta_p^2=0.07$ ).

178         Computationally, how might the cerebellum contribute to the attentional control of  
179 perceptual sensitivity in time? Given the cerebellar involvement in interval-based timing across  
180 timing domains, an intuitive hypothesis is that the cerebellum is necessary for the representation  
181 of isolated intervals<sup>15,36</sup>. By this view, predictive processing in non-cerebellar circuits (e.g.,  
182 prefrontal cortex) relies on cerebellar interval representations to parameterize the temporal  
183 dimension of the prediction. In rhythm-based orienting, an interval-based mechanism would not  
184 be required as the temporal parameters are contained within ongoing neural dynamics. However,  
185 a broader hypothesis is that the interval-based prediction itself is formed within the cerebellum,  
186 part of the cerebellar role in prediction in the motor domain and beyond<sup>24,37,38</sup>. By this view, these  
187 cerebellar temporal predictions guide proactive modulation in non-cerebellar circuits according to  
188 task goals (e.g., to prepare perceptual or motor systems). In rhythm-based orienting, dedicated  
189 prediction mechanisms are not necessary due to the self-sustaining limit-cycle properties of the  
190 putatively entrained oscillatory dynamics. Future work should aim to explore the separability of  
191 timing and prediction, identifying the cerebellar computations that provide the essential  
192 information for temporal orienting.

193

194 Materials and Methods

195 **Participants**

196 15 individuals with cerebellar degeneration (CD) and 14 age-matched neurotypical control  
197 individuals were recruited for the study. The data from two individuals from each group were  
198 discarded: One was unable to perform the task, two showed no convergence on the staircase  
199 procedure used to determine the perceptual threshold, and one asked to terminate the session  
200 prematurely. Thus, the final sample size was 13 CD and 12 control participants. The sample size  
201 was determined using power calculations to allow 80% power to detect effects with Cohen's  $d=0.8$   
202 (a conservative estimate, given the typical effect size of temporal cuing in prior studies: Cohen's  
203  $d=1-1.5$ , <sup>3,10,20</sup>). All participants provided informed consent and were financially compensated for  
204 their participation. The study was approved by the Institutional Review Board at the University of  
205 California, Berkeley.

206 Participants in the CD group (9 females, 12 right-handed, mean age=56.2 years,  $sd=11.1$ )  
207 had been diagnosed with spinocerebellar ataxia, a slowly progressive adult-onset degenerative  
208 disorder in which the primary pathology involves atrophy of the cerebellum. We did not test  
209 patients who presented symptoms of multisystem atrophy. Eight individuals in the CD group had  
210 a specific genetic subtype (SCA3=2, SCA6=3, SCA17=1, SCA35=1, AOA2=1) and the other 5  
211 individuals had CD of unknown/idiopathic etiology. All of the CD participants provided a medical  
212 history to verify the absence of other neurological conditions, and were evaluated at the time of  
213 testing with the Scale for the Assessment and Rating of Ataxia (SARA)<sup>39</sup>. The mean SARA score  
214 was 13.5 ( $sd=6.3$ ). Control participants (8 females, 11 right-handed, mean age=59.1,  $sd=10.2$ )  
215 were recruited from the same age range as the CD group, and, based on self-reports, did not have

216 a history of neurological or psychiatric disorders. The CD and Control groups did not differ  
217 significantly in age ( $p=0.52$ ).

218 All participants were prescreened for normal or corrected-to-normal vision and intact color  
219 vision. We also screened for professional musical training or recent amateur participation in  
220 musical activities (e.g., playing a musical instrument or singing in a choir), with the plan to exclude  
221 individuals with such experience (none did). All of the participants completed the Montreal  
222 Cognitive Assessment (MoCA)<sup>40</sup> as a simple assessment of overall cognitive competence.  
223 Although we did not select participants to provide a match on this measure, there was no significant  
224 group difference (CD: mean=26.7, Control: mean=27.5,  $p=0.32$ ).

225

## 226 **Stimuli and task**

227 For the experimental task, participants discriminated the orientation of a masked visual  
228 target, whose timing was cued on each trial (Figure 1). The target was a grayscale, luminance-  
229 defined sinusoidal Gabor gratings (size: 400 x 400 pixels, 11 x 11 cm, 10° visual angle; spatial  
230 frequency = 1 cycle/degree; Gaussian standard deviation = 2.5°) that was either oriented  
231 horizontally or vertically. The target was embedded in a dynamic, white noise mask. This mask  
232 was a square (size: 400 x 400 pixels) in which each pixel was randomly assigned a luminance  
233 value between 0.25 to 0.75 (with 0 and 1 being black, RGB: [0,0,0] and white, RGB: [255,255,255]  
234 respectively). The luminance value for each pixel in the mask was updated every 16.6 ms (once  
235 per monitor refresh cycle) throughout the trial. The contrast of the target relative to the background  
236 noise was adjusted for each participant (see below). Temporal cues were provided by black squares  
237 (size: 200 x 200 pixels, 5.5 x 5.5 cm, 5° visual angle). All stimuli were created in MATLAB  
238 (MathWorks, Natick, MA) and presented using the Psychtoolbox v.3.0 package for MATLAB<sup>41,42</sup>.

239 The stimuli were presented foveally on a gray background (RGB: [128,128,128]) on a 24-in  
240 monitor (resolution: 1920 x 1080 pixels, refresh rate: 60 Hz) at a viewing distance of ~65 cm.

241 The dynamic noise mask remained visible throughout the duration of the trial. The other  
242 stimuli were superimposed on this mask. The suprathreshold temporal cue involved the serial  
243 presentation of two or three black squares (100 ms duration each), with the first black square  
244 always appearing 750 ms after the onset of the dynamic mask. The black squares were followed  
245 by a suprathreshold white square, the warning signal (WS, also 100 ms duration), which was  
246 followed in turn by the near-threshold target (50 ms duration) after either 600 ms (early target) or  
247 1000 ms (late target). Note that given the screen refresh rate, the 50 ms target was successively  
248 embedded in three different masks.

249 The dynamic noise mask remained visible for 1700 ms after WS onset regardless of the  
250 target timing (1100 ms after early target onset, 700 ms after late target onset). After the termination  
251 of the mask, the screen was blank for a variable interval of 400-900 ms (randomly selected). At  
252 the end of this interval, a visual instruction appeared, requesting that the participant indicate the  
253 perceived orientation of the target (e.g., “*vertical (press X) ? horizontal (press M)*”). Responses  
254 were made with the X and M keyboard keys, assigned randomly for each participant and fixed for  
255 the entirety of the experiment. The participants were instructed that the discrimination would be  
256 difficult and, if uncertain, to make their “best guess”. Note that the procedure involved a long delay  
257 between stimulus offset and the response cue (1500-2000 ms for short interval targets and 1300-  
258 1600 ms for long interval targets). This long delay, coupled with the instructions, was included to  
259 eliminate the demands on motor preparation around the time of the target presentation and, as such,  
260 assure that observed benefits from the temporal cues arose from processes involved in perceptual  
261 discrimination.

262 Two types of sequences, tested in separate blocks, were used to provide temporal cues. In  
263 the Interval task, the sequence consisted of two black squares, with a stimulus onset asynchrony  
264 (SOA) of either 600 ms (short cue) or 1000 ms (long cue). The SOA between the second black  
265 square and WS was randomly set on each trial to be either 1.5 or 2.5 times the cue interval on that  
266 trial (short cue trials: 900 / 1500 ms; long cue trials: 1500 / 2500 ms), strongly reducing any  
267 periodicity between the timing of the cue and target<sup>21</sup>. In the Rhythm task, the sequence consisted  
268 of three black squares, presented periodically with an SOA of 600 ms (short cue, equivalent to  
269 1.66 Hz) or 1000 ms (long cue, 1 Hz). The SOA between the third black square and WS was the  
270 same duration as the cue SOA for that trial. Thus, the WS fell on the “beat” established by the  
271 temporal cues.

272 In both tasks, the SOA between the WS and target was either the same SOA as defined by  
273 the temporal cue (valid trial, 62.5% of trials) or the non-cued SOA (invalid trials, 25% of trials).  
274 This ratio was selected to incentivize the participant to use the temporal cues to facilitate  
275 performance on this challenging task. On the remaining 12.5% of the trials, no target was  
276 presented. We included these catch trials to discourage participants from re-orienting their  
277 attention in time to the long interval when they failed to detect an early onset target.

278

## 279 **Procedure**

280 Upon arrival, all participants provided consent, demographic information, and completed  
281 the MoCA. The CD participants also provided their clinical history and were evaluated with the  
282 SARA.

283 The experiment was conducted in a quiet, dimly lit room. The session began with a  
284 familiarization stage, in which participants performed four practice trials with 100% target contrast

285 followed by four with 40% target contrast. The latter were included to demonstrate to the  
286 participants how difficult it could be to make a simple orientation judgment when the contrast of  
287 the target was similar to that of the mask.

288       Following this familiarization phase, we used an adaptive method to determine, on an  
289 individual basis, the target contrast level expected to produce discrimination accuracy of ~79%  
290 (descending staircase procedure, 3 down 1 up<sup>43</sup>, step size = 2%, 10 reversals). We opted to target  
291 79% accuracy to provide sufficient room to detect improvement (to a ceiling of 100%  
292 performance) or impairment (to a floor of 50% performance). Importantly, for this adaptive  
293 procedure only rhythmic temporal cues were used, and the target always appeared at the expected  
294 time (valid). Our reasoning here was that if the CD group were able to use the temporal cues to  
295 modulate perception, it is more likely to occur in this task (and have a similar threshold value as  
296 controls) given previous work showing that these individuals are not impaired in utilizing rhythmic  
297 temporal cues<sup>10</sup>. In this way, we would be positioned to ask if the CD group showed an impaired  
298 validity effect in the Rhythm task as well as overall performance (valid and invalid trials) on the  
299 Interval task. The contrast level identified from the adaptive procedure for a given individual was  
300 used in the main experiment for both tasks. Consistent with our expectation, the mean contrast  
301 level did not differ between groups ( $t(23)=0.83$ ,  $p=0.41$ ).

302       In the main experiment, participants performed four blocks of each task, alternating  
303 between Rhythm and Interval blocks (8 blocks total). Each block consisted of 32 trials, 16 with  
304 the short temporal cue and 16 with the long temporal cue. Of these 16 trials, the target appeared at  
305 the cued time on 10 trials (valid), the uncued time on 4 trials (invalid), and did not appear on 2  
306 trials (catch). When present, the target was horizontal on 50% of the trials and vertical on the other  
307 50% of the trials. Short breaks were provided between each block.

308 To ensure that the target contrast fell in a range that would be optimal for detecting a  
309 validity effect, we calculated the averaged performance on valid trials across the two tasks after  
310 each pair of blocks. If the value was higher than 95%, we reduced the target contrast for subsequent  
311 blocks by 4%, and if it was lower than 60%, we increased it by 4%. Block pairs in which  
312 performance was above 95% or below 60% were not included in the  $d'$  analyses (8 excluded blocks  
313 across all participants; exclusion had no impact on the statistical tests).

314 Prior to the first block for each task, the experimenter demonstrated the trial sequence and  
315 then conducted practice trials until the participant could describe how the cues were predictive of  
316 the onset time of the target. For subsequent blocks, the participant first completed two practice  
317 trials as a reminder of the format for the temporal cues in the forthcoming block. Participants  
318 received feedback on their performance after these practice trials (but not after any of the staircase  
319 or experimental trials).

320

### 321 **Statistical analysis**

322 Following standard practices for data analysis in non-speeded, 2-AFC tasks, we quantified  
323 discrimination performance by calculating, on an individual basis, a  $d'$  score separately  
324 for each combination of task, target interval and cue validity. These values were calculated by  
325 subtracting the  $z$ -score of the percentage of hits from the  $z$ -score of the percentage of false alarms  
326 (referring to vertical and horizontal categories as “stimulus present” and “stimulus absent”,  
327 respectively, in classic signal detection terminology). As the “hit” category was arbitrarily  
328 assigned to one orientation and the two orientations were equally probable, we did not calculate or  
329 analyze the criterion index. An increase in perceptual sensitivity due to temporal anticipation



330 should be manifest as an increase in  $d'$  when the target appeared at the expected time compared to  
331 when it appeared at the unexpected time (validity effect).

332 Previous work indicates that validity effects from temporal cues in two-interval designs  
333 such as that used here are usually attenuated for late onset targets, either due to re-orienting of  
334 attention in time or foreperiod effects<sup>23</sup>. As such, our *a priori* plan was to focus on trials with short  
335 interval targets to increase sensitivity for detecting attenuation of the validity effect. To confirm  
336 that this pattern was present in our data, we subjected  $d'$  values to an omnibus 4-way mixed  
337 ANOVA with a between-subject factor Group (CD / Control), and within-subject factors Task  
338 (Interval / Rhythm), Target Interval (Early / Late) and Cue Validity (Valid / Invalid), and tested  
339 the directional hypothesis of a larger effect of the Cue Validity factor for target appearing at early  
340 compared to late intervals using a one-tailed test. As expected (see Results), we observed a  
341 significant Cue Validity X Target Interval interaction in the expected direction, and post-hoc  
342 comparisons showed that the validity effect was only significant in the Early Interval condition.

343 The  $d'$  values for short interval targets were analyzed using a mixed ANOVA with a  
344 between-subject factor Group (CD / Control), and within-subject factors Task (Interval / Rhythm)  
345 and Cue Validity (Valid / Invalid). To assess the effect of cue validity within each group and task,  
346 we used within-subject t-tests. To compare the cue validity effect between groups within each task,  
347 we used a mixed ANOVA with factors Group (CD / Control) and Cue Validity (valid / invalid).  
348 Finally, to assess context-specificity within the CD group, we performed an orthogonal contrast,  
349 comparing the cue validity effects between tasks using a repeated-measures ANOVA with factors  
350 Task (Interval / Rhythm) and Cue Validity. In all analyses, effect sizes were estimated using  
351 Cohen's  $d$  and partial eta-squared ( $\eta_p^2$ ).

352

353

354           **Acknowledgements:** We thank Arohi Saxena for assistance in collecting the data.

355   **Funding:** This work was supported by grants from the National Institute of Health (NS092079,  
356   NS116883). **Competing Interests:** The authors declare that they have no competing interests.

357   **Author Contributions:** A.B. and R.B.I. conceived the study, designed the experiments, and  
358   wrote the paper. A.B. provided software, collected the data, and analyzed the data.

359

360  
361  
362  
363  
364  
365  
366  
367  
368  
369  
370  
371  
372  
373  
374  
375  
376  
377  
378  
379  
380  
381  
382

## References

1. Nobre, A. C. & Van Ede, F. Anticipated moments: Temporal structure in attention. *Nat. Rev. Neurosci.* **19**, 34–48 (2018).
2. Correa, Á., Lupiáñez, J. & Tudela, P. Attentional preparation based on temporal expectancy modulates processing at the perceptual level. *Psychon. Bull. Rev.* **12**, 328–334 (2005).
3. Rohenkohl, G., Cravo, A. M., Wyart, V. & Nobre, A. C. Temporal Expectation Improves the Quality of Sensory Information. *J. Neurosci.* **32**, 8424–8428 (2012).
4. Davranche, K., Nazarian, B., Vidal, F. & Coull, J. Orienting attention in time activates left intraparietal sulcus for both perceptual and motor task goals. *J. Cogn. Neurosci.* **23**, 3318–3330 (2011).
5. Coull, J. T. & Nobre, A. C. Where and when to pay attention: the neural systems for directing attention to spatial locations and to time intervals as revealed by both PET and fMRI. *J. Neurosci.* **18**, 7426–35 (1998).
6. Bolger, D., Coull, J. T. & Schön, D. Metrical Rhythm Implicitly Orients Attention in Time as Indexed by Improved Target Detection and Left Inferior Parietal Activation. *J. Cogn. Neurosci.* **26**, 593–605 (2014).
7. Posner, M. I. & Peterson, S. E. The Attention System Of The Human Brain. *Annu. Rev. Neurosci.* **13**, 25–42 (1990).
8. Corbetta, M. & Shulman, G. L. Control of goal-directed and stimulus-driven attention in the brain. *Nat. Rev. Neurosci.* **3**, 201–215 (2002).
9. Fiebelkorn, I. C. & Kastner, S. Functional Specialization in the Attention Network. *Annu. Rev. Psychol.* **71**, 221–249 (2020).

- 383 10. Breska, A. & Ivry, R. B. Double dissociation of single-interval and rhythmic temporal  
384 prediction in cerebellar degeneration and Parkinson's disease. *Proc. Natl. Acad. Sci.*  
385 201810596 (2018) doi:10.1073/pnas.1810596115.
- 386 11. Breska, A. & Ivry, R. B. Context-specific control over the neural dynamics of temporal  
387 attention by the human cerebellum. *Sci. Adv.* **6**, eabb1141 (2020).
- 388 12. Sanabria, D., Capizzi, M. & Correa, Á. Rhythms That Speed You Up. *J. Exp. Psychol.*  
389 *Hum. Percept. Perform.* **37**, 236–244 (2011).
- 390 13. Morillon, B., Schroeder, C. E., Wyart, V. & Arnal, L. H. Temporal Prediction in lieu of  
391 Periodic Stimulation. *J. Neurosci.* **36**, 2342–2347 (2016).
- 392 14. van Ede, F., Rohenkohl, G., Gould, I. & Nobre, A. C. Purpose-dependent consequences of  
393 temporal expectations serving perception and action. *J. Neurosci.* **40**, JN-RM-1134-20  
394 (2020).
- 395 15. Ivry, R. B. & Keele, S. W. Timing functions of the cerebellum. *J. Cogn. Neurosci.* **1**, 136–  
396 152 (1989).
- 397 16. Perrett, S. P., Ruiz, B. P. & Mauk, M. D. Cerebellar Cortex Lesions Disrupt Learning-  
398 dependent timing of Conditioned Eyelid Responses. *J. Neurosci.* **13**, 1708–1718 (1993).
- 399 17. Shalev, N., Nobre, A. C. & van Ede, F. Time for What? Breaking Down Temporal  
400 Anticipation. *Trends Neurosci.* **42**, 373–374 (2019).
- 401 18. Raymond, Jane, E., Shapiro, Kimron, L. & Arnell, Karen, M. Temporary suppression of  
402 visual processing in an RSVP task: an attentional blink? *Journal of Experimental*  
403 *Psychology: Human Perception and Performance* vol. 18 849–860 (1992).
- 404 19. Miniussi, C., Wilding, E. L., Coull, J. T. & Nobre, A. C. Orienting attention in time.  
405 Modulation of brain potentials. *Brain* **122**, 1507–1518 (1999).

- 406 20. Rohenkohl, G., Gould, I. C., Pessoa, J. & Nobre, A. C. Combining spatial and temporal  
407 expectations to improve visual perception. *J. Vis.* **14**, 8–8 (2014).
- 408 21. Breska, A. & Deouell, L. Y. Neural mechanisms of rhythm-based temporal prediction:  
409 Delta phase-locking reflects temporal predictability but not rhythmic entrainment. *PLoS*  
410 *Biol.* **15**, 1–30 (2017).
- 411 22. Green, D. M. & Swets, J. A. *Signal detection theory and psychophysics*. (New York:  
412 Wiley, 1966).
- 413 23. Correa, Á., Lupiáñez, J. & Tudela, P. The attentional mechanism of temporal orienting:  
414 Determinants and attributes. *Exp. Brain Res.* **169**, 58–68 (2006).
- 415 24. Sokolov, A. A., Miall, R. C. & Ivry, R. B. The Cerebellum: Adaptive Prediction for  
416 Movement and Cognition. *Trends Cogn. Sci.* **21**, 313–332 (2017).
- 417 25. Gómez, C. M. *et al.* Current source density analysis of CNV during temporal Gap  
418 paradigm. *Brain Topogr.* **13**, 149–159 (2001).
- 419 26. Praamstra, P. Neurophysiology of Implicit Timing in Serial Choice Reaction-Time  
420 Performance. *J. Neurosci.* **26**, 5448–5455 (2006).
- 421 27. O’Reilly, J. X., Mesulam, M. M. & Nobre, A. C. The Cerebellum Predicts the Timing of  
422 Perceptual Events. *J. Neurosci.* **28**, 2252–2260 (2008).
- 423 28. Townsend, J. *et al.* Spatial attention deficits in patients with acquired or developmental  
424 cerebellar abnormality. *J. Neurosci.* **19**, 5632–5643 (1999).
- 425 29. Allen, G., Buxton, R. B., Wong, E. C. & Courchesne, E. Attentional activation of the  
426 cerebellum independent of motor involvement. *Science (80-. )*. **275**, 1940–1943 (1997).
- 427 30. Ravizza, S. M. & Ivry, R. B. Comparison of the basal ganglia and cerebellum in shifting  
428 attention. *J. Cogn. Neurosci.* **13**, 285–297 (2001).

- 429 31. Haarmeier, T. & Thier, P. The attentive cerebellum - Myth or reality? *Cerebellum* **6**, 177–  
430 183 (2007).
- 431 32. Haegens, S. & Zion Golumbic, E. Rhythmic facilitation of sensory processing: A critical  
432 review. *Neurosci. Biobehav. Rev.* **86**, 150–165 (2018).
- 433 33. Drake, C. & Botte, M. C. Tempo sensitivity in auditory sequences: Evidence for a  
434 multiple-look model. *Percept. Psychophys.* **54**, 277–286 (1993).
- 435 34. Grube, M., Cooper, F. E., Chinnery, P. F. & Griffiths, T. D. Dissociation of duration-  
436 based and beat-based auditory timing in cerebellar degeneration. *Proc. Natl. Acad. Sci.*  
437 **107**, 11597–11601 (2010).
- 438 35. Spencer, R. M. C., Zelaznik, H. N., Diedrichsen, J. & Ivry, R. B. Disrupted timing of  
439 discontinuous but not continuous movements by cerebellar lesions. *Science (80-. )*. **300**,  
440 1437–1439 (2003).
- 441 36. Ivry, R. B. & Schlerf, J. E. Dedicated and intrinsic models of time perception. *Trends*  
442 *Cogn. Sci.* **12**, 273–280 (2008).
- 443 37. Wolpert, D. M., Miall, R. C. & Kawato, M. Internal models in the cerebellum. *Trends*  
444 *Cogn. Sci.* **2**, 338–347 (1998).
- 445 38. Miall, R. C., Weir, D. J., Wolpert, D. M. & Stein, J. F. Is the cerebellum a smith  
446 predictor? *J. Mot. Behav.* **25**, 203–216 (1993).
- 447 39. Schmitz-Hübsch, T. *et al.* Scale for the assessment and rating of ataxia: Development of a  
448 new clinical scale. *Neurology* **66**, 1717–1720 (2006).
- 449 40. Charbonneau, S., Whitehead, V. & Collin, I. The Montreal Cognitive Assessment ,  
450 MoCA : A Brief Screening. 695–699 (2005).
- 451 41. Pelli, D. G. The VideoToolbox software for visual psychophysics: transforming numbers

- 452           into movies. *Spat. Vis.* **10**, 437–42 (1997).
- 453   42.   Brainard, D. H. The Psychophysics Toolbox. *Spat. Vis.* **10**, 433–436 (1997).
- 454   43.   Levitt, H. Transformed Up-Down Methods in Psychoacoustics. *J. Acoust. Soc. Am.* **49**,
- 455           467–477 (1971).
- 456
